# Supplementary material for: Genetic Aberrations Associated with Photodynamic Therapy in Colorectal Cancer Cells
Source: MDPI journal article supplement (doi:10.3390/ijms20133254), 2019-07-02
Supplement: s1 [file s1]

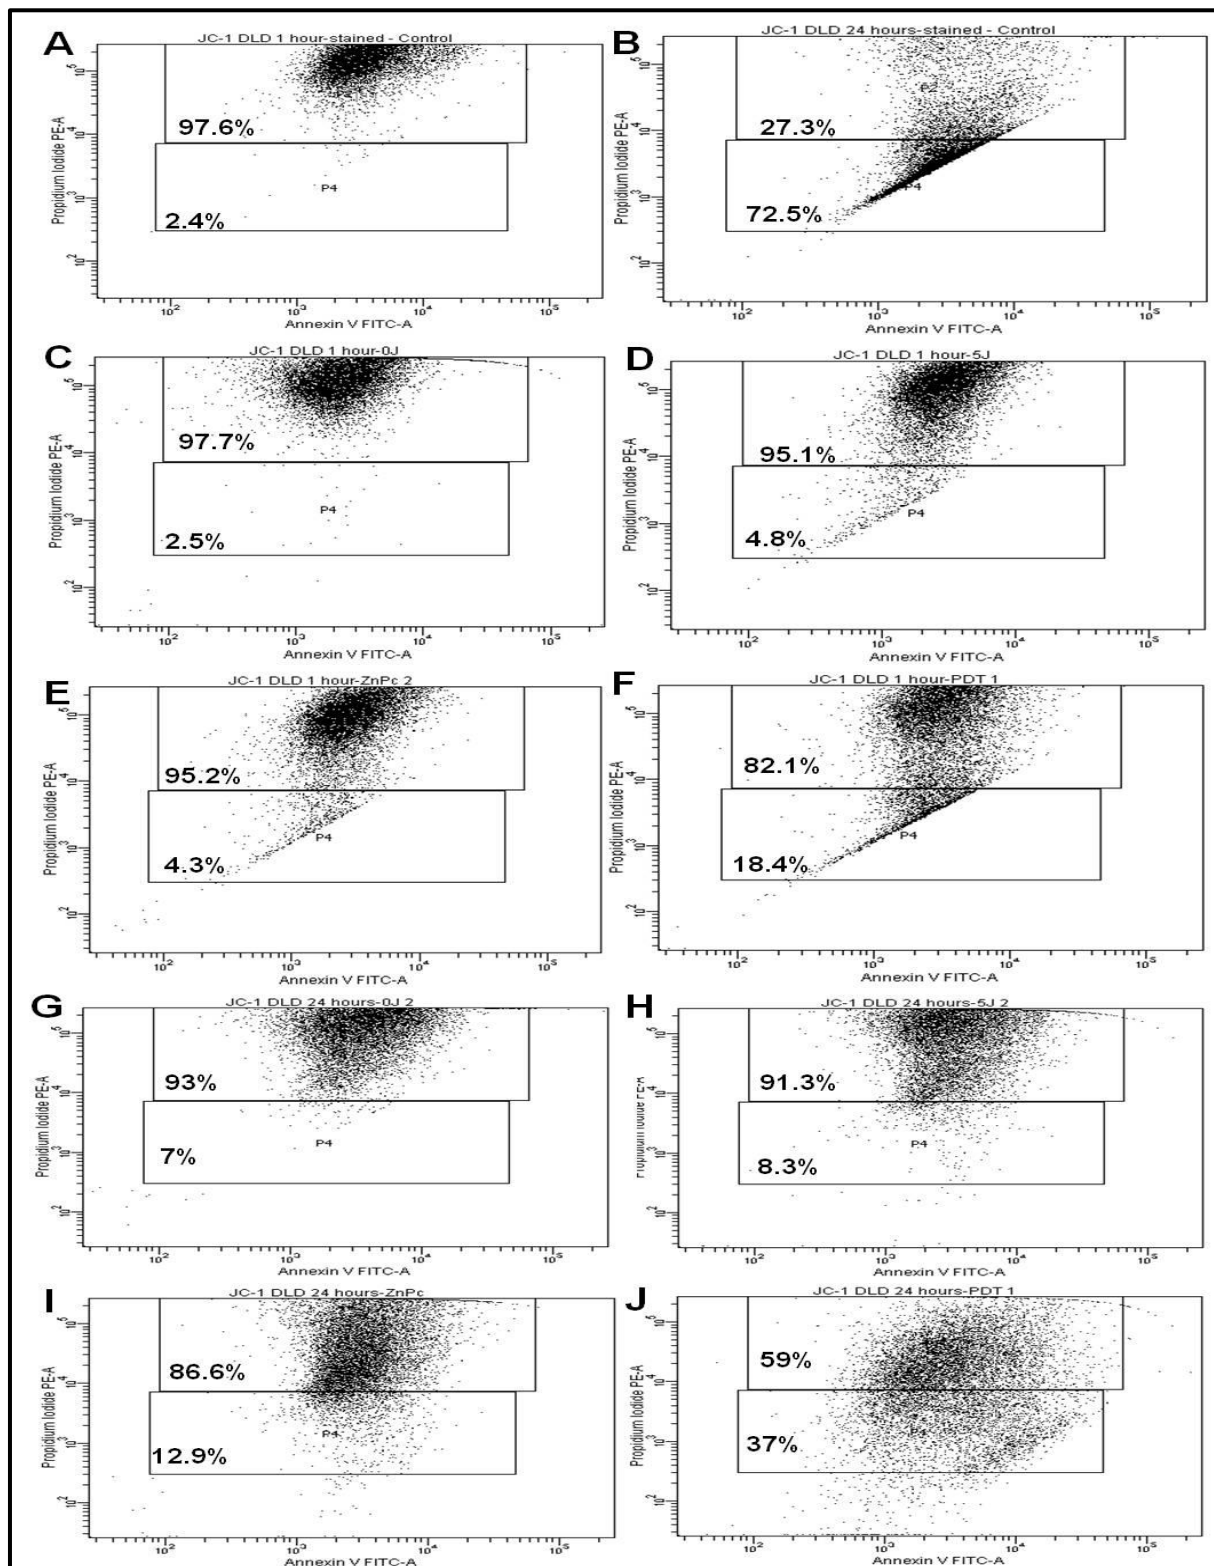

**Figure S1** JC-1 flow cytometric dot plot. Dot plot A and B are negative and positive controls, respectively. Untreated, irradiated and ZnPcS<sub>mix</sub> treated DLD-1 cells consisted of a high percentage of polarized cells after 1 (C, D, E, respectively) and 24 h (G, H, I, respectively) incubation as seen on the top quadrant; whereas PDT treated DLD-1 cells had a significant portion of cells that had shifted to the green fluorescence (bottom quadrant) after 1 (F) and 24 h (J) incubation post-PDT, denoting cell death.

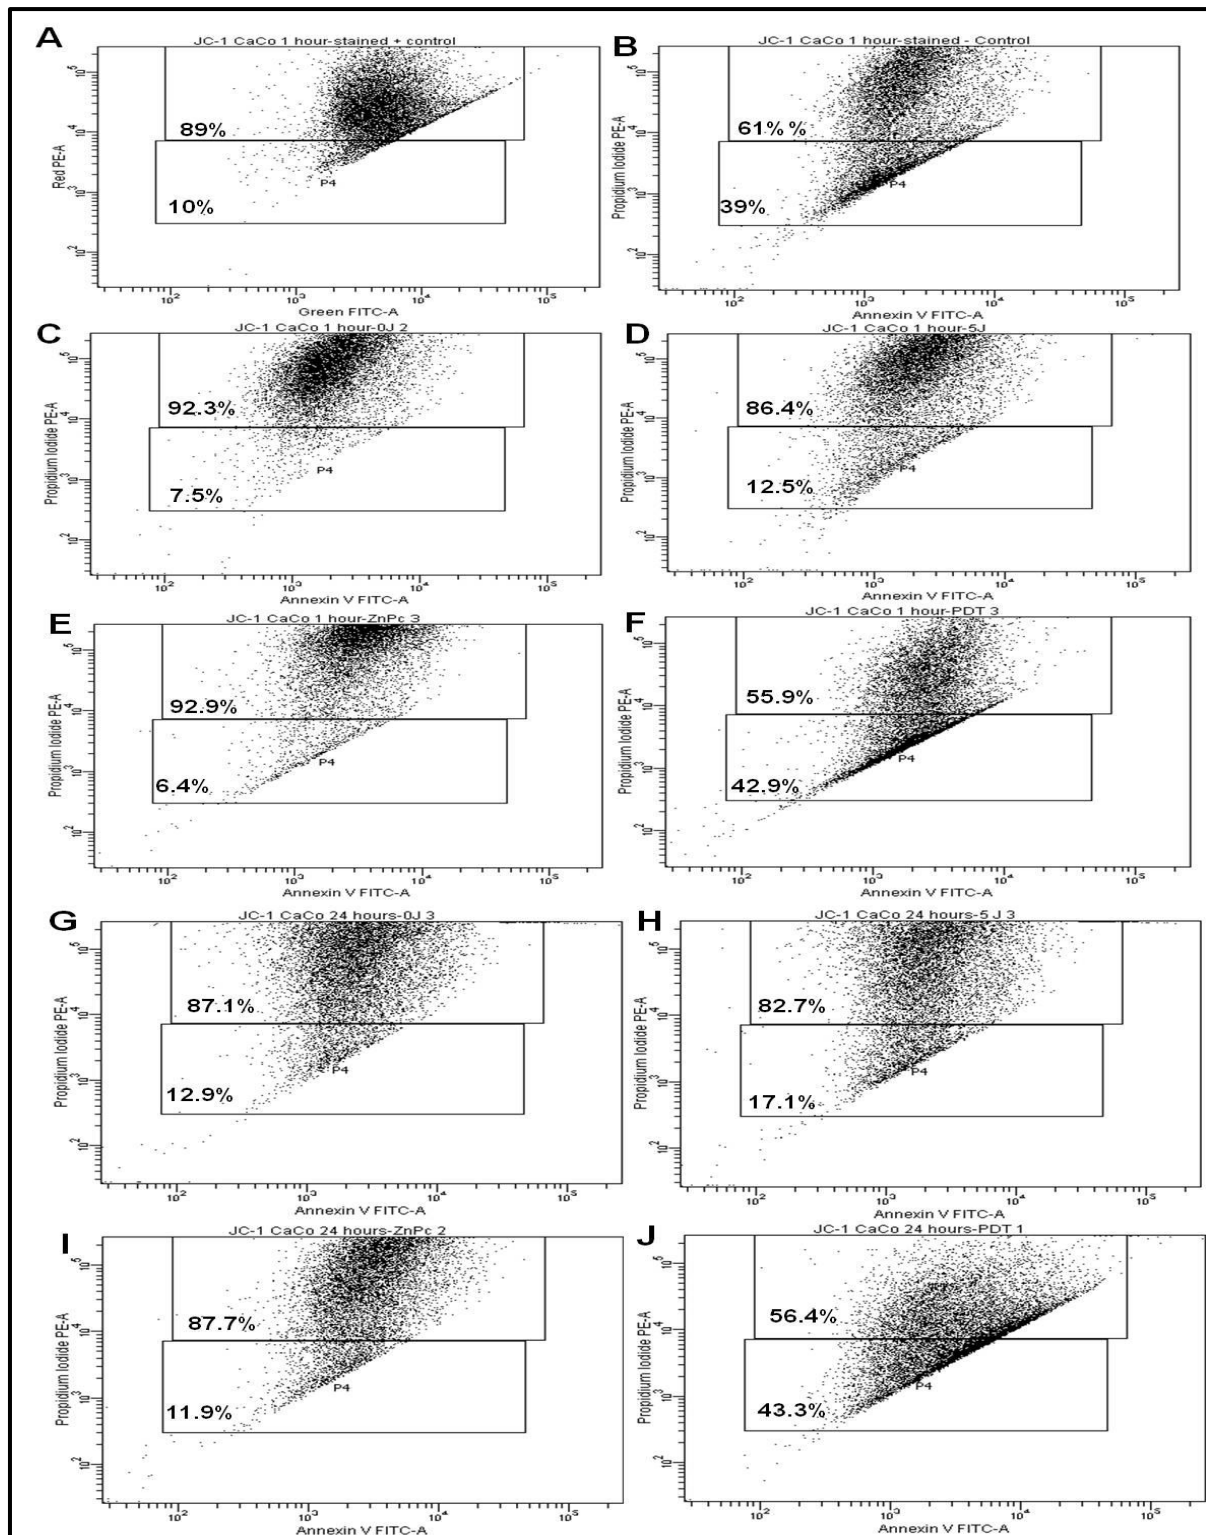

**Figure S2** JC-1 flow cytometric dot plot. Dot plot A and B are positive and negative apoptotic controls, respectively. Untreated, irradiated and ZnPC<sub>mix</sub> treated CaCo-2 cells consisted of a high percentage of polarized cells after 1 (C, D, E, respectively) and 24 h (G, H, I, respectively) incubation as seen on the top quadrant; whereas PDT treated CaCo-2 cells had a significant portion of cells that had shifted to the green fluorescence (bottom quadrant) after 1 (F) and 24 h (J) incubation post-PDT, denoting cell death.
